# Supplementary material for: A screening method to identify efficient sgRNAs in Arabidopsis, used in conjunction with cell-specific lignin reduction
Source: PubMed Central journal article supplement (PMC6532251; doi:10.1186/s13068-019-1467-y), 2019-05-23
Supplement: 13068_2019_1467_MOESM3_ESM.pdf [file 13068_2019_1467_MOESM3_ESM.pdf]

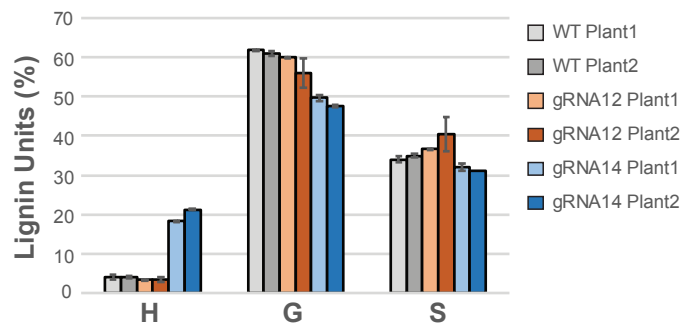

**Additional File 3.** Lignin composition of T1 plants with fiber cell-specific *HCT* editing. Based on the results from the transient assay, HCT\_gRNA12 and HCT\_gRNA14 represent a less efficient sgRNA and a highly efficient sgRNA respectively. H, G, and S designate p-hydroxyphenyl, guaiacyl, and syringyl lignin units respectively. Results of two independent transgenic plants of each genotype are shown. Values were means  $\pm$  SD of two technical replicates.
