# Supplementary material for: A screening method to identify efficient sgRNAs in Arabidopsis, used in conjunction with cell-specific lignin reduction
Source: PubMed Central journal article supplement (PMC6532251; doi:10.1186/s13068-019-1467-y), 2019-05-23
Supplement: 13068_2019_1467_MOESM6_ESM.pdf [file 13068_2019_1467_MOESM6_ESM.pdf]

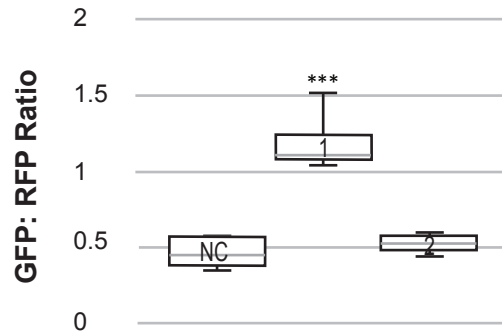

**Additional File 6.** Editing efficiency of the two screened GONST2\_gRNAs. The relative efficiency of individual GONST2\_gRNA is expressed as GFP:RFP ratios. NC, negative control. Data represent the mean + SD of 5-7 biological replicates. For details of the individual sgRNAs, see Additional File1. Asterisks indicate significant differences compared to NC using the unpaired Student's *t*-test (\*\*\*) ( $P < 0.001$ ).
