# Supplementary material for: A screening method to identify efficient sgRNAs in Arabidopsis, used in conjunction with cell-specific lignin reduction
Source: PubMed Central journal article supplement (PMC6532251; doi:10.1186/s13068-019-1467-y), 2019-05-23
Supplement: 13068_2019_1467_MOESM7_ESM.pdf [file 13068_2019_1467_MOESM7_ESM.pdf]

**Additional File 7.** Zygosity of the T1 generation of *GONST2* targeted Arabidopsis plants. Sanger sequencing results of amplicons of the *GONST2*\_gRNA targeted regions were analyzed with the TIDE (<https://tide.deskgen.com/>) bioinformatics tool (Brinkman et al. 2014).

i) Analysis on pUBQ10::CAS9-pU6::GONST2\_gRNA1 plants

| T1 Plants | Total Indel Efficiency (%) | Fit of Goodness R <sup>2</sup> | Allele Genotypes and Their Percentage |                  |              |              |             |             | Classification     |
|-----------|----------------------------|--------------------------------|---------------------------------------|------------------|--------------|--------------|-------------|-------------|--------------------|
|           |                            |                                | 1st                                   | 2nd              | 3rd          | 4th          | 5th         | 6th         |                    |
| Plant1    | 71                         | 0.95                           | A Ins, 44.1%                          | WT, 24%          | T Ins, 11.4% | C Ins, 6.7%  | Del, 5.1%   | -           | Chi (WT ≤50%)      |
| Plant3    | 11.3                       | 0.95                           | WT, 85.7%                             | T Ins, 7.3%      | A Ins, 2.0%  | G Ins, 0.1%  | -           | -           | Chi (WT >80%)      |
| Plant4    | 92                         | 0.93                           | A Ins, 77.7%                          | <b>Undefined</b> | C Ins, 2.2%  | T Ins, 0.2%  | -           | -           | Chi Mutant         |
| Plant5    | 49.1                       | 0.96                           | WT, 46.8%                             | T Ins, 45.5%     | C Ins, 2.4%  | A Ins, 0.3%  | G Ins, 0.1% | -           | Chi (WT ≤50%)      |
| Plant6    | 65.3                       | <b>0.69</b>                    | <b>Not estimated</b>                  | -                | -            | -            | -           | -           | Chi Mutant         |
| Plant7    | 66.7                       | 0.95                           | T Ins, 35.4%                          | WT, 28.2%        | Del, 15.6%   | A Ins, 14.0% | -           | -           | Chi (WT ≤50%)      |
| Plant8    | 19                         | 0.96                           | WT, 77%                               | T Ins, 5.3%      | G Ins, 4.6%  | A Ins, 3.6%  | Del, 3.5%   | -           | Chi (50% <WT ≤80%) |
| Plant9    | 13.8                       | 0.98                           | WT, 84%                               | T Ins, 5.9%      | A Ins, 3.3%  | G Ins, 1.4%  | -           | -           | Chi (WT >80%)      |
| Plant10   | 35.9                       | 0.96                           | WT, 60.2%                             | G Ins, 16.2%     | C Ins, 8.5%  | T Ins, 6.5%  | A Ins, 3.1% | -           | Chi (50% <WT ≤80%) |
| Plant11   | 24.1                       | 0.96                           | WT, 71.8%                             | T Ins, 12.6%     | A Ins, 4.9%  | Del, 3.9%    | G Ins, 1.2% | -           | Chi (50% <WT ≤80%) |
| Plant12   | 76.4                       | 0.97                           | C Ins, 37.5%                          | T Ins, 36.8%     | WT, 21%      | G Ins, 0.9%  | A Ins, 0.2% | -           | Chi (WT ≤50%)      |
| Plant13   | 84.9                       | 0.96                           | C Ins, 38.7%                          | T Ins, 38.0%     | WT, 11.6%    | Del, 4.4%    | G Ins, 0.9% | A Ins, 0.2% | Chi (WT ≤50%)      |
| Plant14   | 42.5                       | 0.97                           | WT, 54.1%                             | T Ins, 13.2%     | A Ins, 9.7%  | C Ins, 7.7%  | Del, 5.9%   | G Ins, 4.9% | Chi (50% <WT ≤80%) |
| Plant16   | 90.8                       | 0.99                           | T Ins, 87.3%                          | WT, 8%           | C Ins, 1.9%  | A Ins, 1.1%  | -           | -           | Chi (WT ≤50%)      |
| Plant17   | 77.4                       | 0.98                           | Del, 50.1%                            | WT, 20.2%        | T Ins, 11.6% | A Ins, 8.7%  | G Ins, 4.3% | C Ins, 2.4% | Chi (WT ≤50%)      |
| Plant18   | 1.5                        | 0.99                           | WT, 97.3%                             | -                | -            | -            | -           | -           | WT                 |
| Plant19   | 39.9                       | 0.97                           | WT, 57.3%                             | T Ins, 16.8%     | A Ins, 13.7% | C Ins, 6.9%  | Del, 1.6%   | G Ins, 0.6% | Chi (50% <WT ≤80%) |

ii) Analysis on pUBQ10::CAS9-pU6::GONST2\_gRNA2 plants

| T1 Plants | Total Indel Efficiency (%) | Fit of Goodness R <sup>2</sup> | Allele Genotypes and Their Percentage |              |             |             |             |     | Classification     |
|-----------|----------------------------|--------------------------------|---------------------------------------|--------------|-------------|-------------|-------------|-----|--------------------|
|           |                            |                                | 1st                                   | 2nd          | 3rd         | 4th         | 5th         | 6th |                    |
| Plant1    | 4                          | 0.97                           | WT, 93.3%                             | -            | -           | -           | -           | -   | WT                 |
| Plant3    | 1.2                        | 0.99                           | WT, 97.9%                             | -            | -           | -           | -           | -   | WT                 |
| Plant4    | 35.3                       | 0.98                           | WT, 62.4%                             | A Ins, 33.8% | T Ins, 1.0% | -           | -           | -   | Chi (50% <WT ≤80%) |
| Plant5    | 3                          | 0.99                           | WT, 95.9%                             | T Ins, 1.4%  | G Ins, 1.0% | -           | -           | -   | Chi (WT >80%)      |
| Plant6    | 5.6                        | 0.98                           | WT, 92.4%                             | A Ins, 4.1%  | T Ins, 0.7% | G Ins, 0.3% | -           | -   | Chi (WT >80%)      |
| Plant7    | 2.4                        | 0.99                           | WT, 96.7%                             | A Ins, 2.2%  | T Ins, 0.1% | -           | -           | -   | Chi (WT >80%)      |
| Plant8    | 15.4                       | 0.99                           | WT, 83.9%                             | A Ins, 12.0% | T Ins, 0.6% | G Ins, 0.5% | -           | -   | Chi (WT >80%)      |
| Plant10   | 0.3                        | 0.99                           | WT, 98.9%                             | -            | -           | -           | -           | -   | WT                 |
| Plant11   | 10.2                       | 0.99                           | WT, 88.5%                             | A Ins, 6.8%  | T Ins, 0.3% | G Ins, 0.2% | C Ins, 0.1% | -   | Chi (WT >80%)      |
| Plant12   | 10.6                       | 0.99                           | WT, 88.7%                             | A Ins, 9.0%  | T Ins, 0.8% | G Ins, 0.5% | -           | -   | Chi (WT >80%)      |
| Plant13   | 62.5                       | 0.98                           | A Ins, 59.8%                          | WT, 35.6%    | G Ins, 2.0% | T Ins, 0.4% | -           | -   | Chi (WT ≤50%)      |
| Plant14   | 0.6                        | 0.99                           | WT, 98.5%                             | -            | -           | -           | -           | -   | WT                 |
| Plant15   | 2.2                        | 0.99                           | WT, 96.8%                             | A Ins, 1.1%  | T Ins, 0.2% | -           | -           | -   | Chi (WT >80%)      |
| Plant16   | 1.7                        | 0.97                           | WT, 95.8%                             | -            | -           | -           | -           | -   | WT                 |
| Plant17   | 21.9                       | 0.98                           | WT, 76.3%                             | A Ins, 16.6% | Del, 1.3%   | T Ins, 1.1% | G Ins, 1.1% | -   | Chi (50% <WT ≤80%) |
| Plant18   | 0.9                        | 0.99                           | WT, 97.9%                             | -            | -           | -           | -           | -   | WT                 |
| Plant19   | 9.8                        | 0.99                           | WT, 89.2%                             | T Ins, 4.2%  | A Ins, 3.8% | G Ins, 0.8% | -           | -   | Chi (WT >80%)      |
