# Supplementary material for: A screening method to identify efficient sgRNAs in Arabidopsis, used in conjunction with cell-specific lignin reduction
Source: PubMed Central journal article supplement (PMC6532251; doi:10.1186/s13068-019-1467-y), 2019-05-23
Supplement: 13068_2019_1467_MOESM8_ESM.pdf [file 13068_2019_1467_MOESM8_ESM.pdf]

**Additional File 8.** Mutation analysis of T1 transgenic plants of pUBQ10::CAS9-pU6::GONST2\_gRNA1. Genomic DNA was extracted from leaves of T1 Plant4 and Plant6. The region surrounding the target site of GONST2\_gRNA1 was amplified and cloned. Twenty individual clones from each line were sequenced by Sanger sequencing.

| Clone Name      | Mutation Type                           |
|-----------------|-----------------------------------------|
| Plant4 Clone 1  | 46 bp Del <sup>1</sup>                  |
| Plant4 Clone 2  | A Ins                                   |
| Plant4 Clone 3  | Mix of 46 bp Del <sup>1</sup> and A Ins |
| Plant4 Clone 4  | 7bp Ins <sup>2</sup>                    |
| Plant4 Clone 5  | A Ins                                   |
| Plant4 Clone 6  | A Ins                                   |
| Plant4 Clone 7  | A Ins                                   |
| Plant4 Clone 8  | 46 bp Del <sup>1</sup>                  |
| Plant4 Clone 9  | A Ins                                   |
| Plant4 Clone 10 | A Ins                                   |
| Plant4 Clone 11 | A Ins                                   |
| Plant4 Clone 12 | A Ins                                   |
| Plant4 Clone 13 | A Ins                                   |
| Plant4 Clone 14 | A Ins                                   |
| Plant4 Clone 15 | Mix of 46 bp Del <sup>1</sup> and A Ins |
| Plant4 Clone 16 | A Ins                                   |
| Plant4 Clone 17 | A Ins                                   |
| Plant4 Clone 18 | 46 bp Del <sup>1</sup>                  |
| Plant4 Clone 19 | A Ins                                   |
| Plant4 Clone 20 | A Ins                                   |
| Plant6 Clone 1  | 19 bp Ins <sup>3</sup>                  |
| Plant6 Clone 2  | 19 bp Ins <sup>3</sup>                  |
| Plant6 Clone 3  | T Insert                                |
| Plant6 Clone 4  | Mix of T Ins and 19bp Ins <sup>3</sup>  |
| Plant6 Clone 5  | 19 bp Ins <sup>3</sup>                  |
| Plant6 Clone 6  | C Del                                   |
| Plant6 Clone 7  | C Del                                   |
| Plant6 Clone 8  | C Del                                   |
| Plant6 Clone 9  | 19 bp Ins <sup>3</sup>                  |
| Plant6 Clone 10 | T Insert                                |
| Plant6 Clone 11 | not matching                            |
| Plant6 Clone 12 | T Insert                                |
| Plant6 Clone 13 | no priming                              |
| Plant6 Clone 14 | T Insert                                |
| Plant6 Clone 15 | C Del                                   |
| Plant6 Clone 16 | T Insert                                |
| Plant6 Clone 17 | T Insert                                |
| Plant6 Clone 18 | 19 bp Ins <sup>3</sup>                  |
| Plant6 Clone 19 | C Del                                   |
| Plant6 Clone 20 | not matching                            |

<sup>1</sup>The 46 bp deletion sequence is: CGGTTGATGGAGATAACAGGCGTGACCACGGGTCTGTGAAACAGTC

<sup>2</sup>The 7bp insertion sequence is: AAATCTT

<sup>3</sup>The 19bp insertion sequence is: CAAATTGTCACAGGATAGA
