# Supplementary material for: A screening method to identify efficient sgRNAs in Arabidopsis, used in conjunction with cell-specific lignin reduction
Source: PubMed Central journal article supplement (PMC6532251; doi:10.1186/s13068-019-1467-y), 2019-05-23
Supplement: 13068_2019_1467_MOESM12_ESM.pdf [file 13068_2019_1467_MOESM12_ESM.pdf]

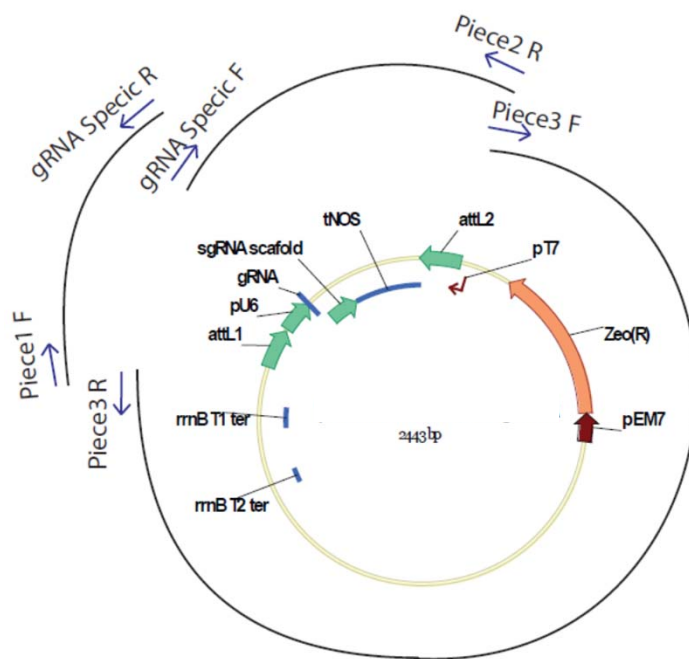

**Additional File 12.** A map demonstrating In-Fusion cloning of Entry Clones containing individual sgRNAs.
